# Supplementary material
Source: Springer Nature journal article supplement (https://www.springermedizin.de/resource/supplementary/12958_2010_713_MOESM3_ESM.pdf/9568656)

**A**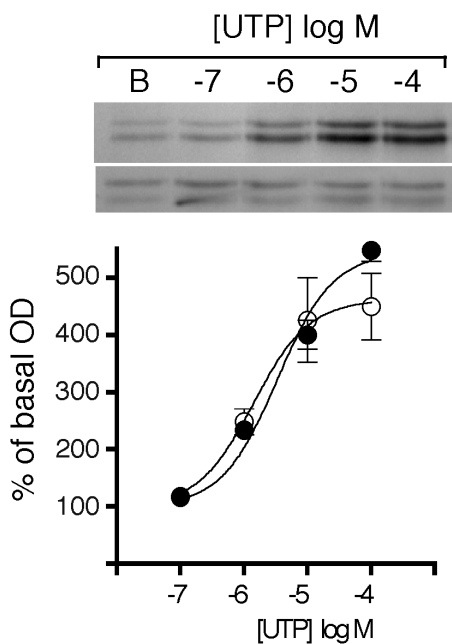**B**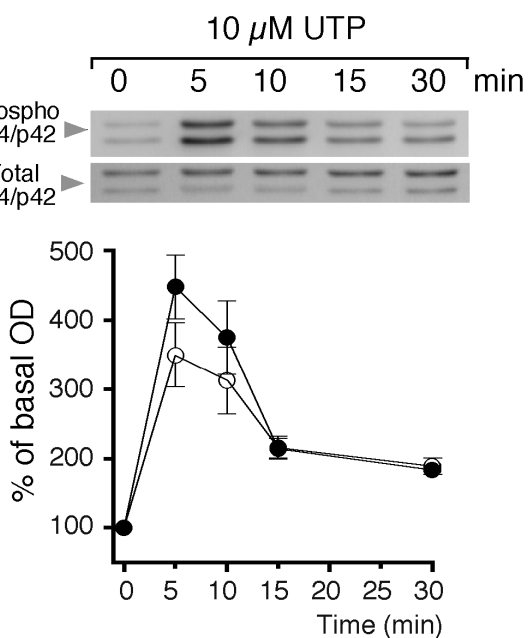**C**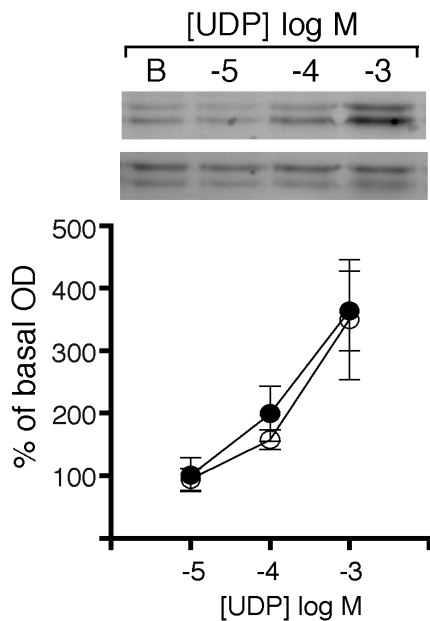**D**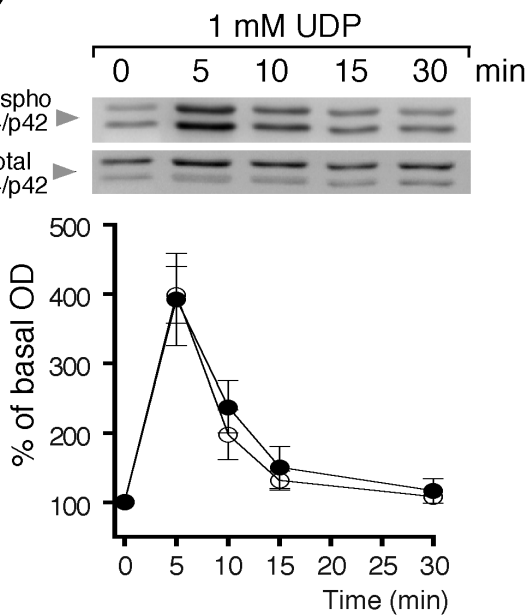

Supplement: MOESM3 [file 9568656]
